# Supplementary material
Source: MDPI journal article supplement (https://www.mdpi.com/2073-4441/15/8/1619)
Supplement: s1 [file s1]

# Effects of Climate Change on the Habitat Suitability and Distribution of Endemic Freshwater Fish Species in Semi-arid Central Anatolian Ecoregion in Türkiye

Mustafa Korkmaz <sup>1,2,\*</sup>, Fatih Mangit <sup>3</sup>, İlayda Dumlupınar <sup>4</sup>, Mehmet Arda Çolak <sup>5</sup>, Mustafa Berkay Akpınar <sup>6</sup>, Meltem Kuru <sup>2</sup>, Juan Pablo Pacheco <sup>7,8</sup>, Arely Ramírez-García <sup>9</sup>, Gültekin Yılmaz <sup>2</sup>, Cihelio Alves Amorim <sup>1</sup>, İbrahim Kaan Özgencil <sup>1</sup>, Deniz İnnal <sup>10</sup>, Sedat Vahdet Yerli <sup>3</sup>, Korhan Özkan <sup>2,11</sup>, Zuhail Akyürek <sup>5,6,11</sup>, Meryem Beklioğlu <sup>1,11</sup>, Erik Jeppesen <sup>1,8,11,12,13,14</sup>

- <sup>1</sup> Department of Biological Sciences, Middle East Technical University, 06800 Ankara, Türkiye; korkmaz.hidro@gmail.com (M.K.); alvescihelio@gmail.com (C.A.A.); kaanozgencil@gmail.com (I.K.Ö.); meryem@metu.edu.tr (M.B.); ej@ecos.au.dk (E.J.)
  - <sup>2</sup> Institute of Marine Sciences, Middle East Technical University, 33731 Mersin, Türkiye; korumeltem99@gmail.com (Me.K.); tekinims@gmail.com (G.Y.); okorhan@metu.edu.tr (K.Ö.)
  - <sup>3</sup> Department of Biology, Hacettepe University, 06800, Ankara, Türkiye; fatih.bio@gmail.com (F.M.); svyerli@gmail.com (S.V.Y.)
  - <sup>4</sup> Graduate School of Science and Engineering, Hacettepe University, 06800 Ankara, Türkiye; ilaydadumlupinar96@gmail.com (I.D.)
  - <sup>5</sup> Department of Geodetic and Geographic Information Technologies, Middle East Technical University, 06800 Ankara, Türkiye; arda.colak@metu.edu.tr (M.A.C.); zakyurek@metu.edu.tr (Z.A.)
  - <sup>6</sup> Department of Civil Engineering, Middle East Technical University, 06800 Ankara, Türkiye; berkay.akpınar@metu.edu.tr (M.B.A.)
  - <sup>7</sup> Centro Universitario de la Regional del Este (CURE), Universidad de la República, Maldonado 11200, Uruguay; jp@ecos.au.dk (J.P.P.)
  - <sup>8</sup> Department of Ecoscience, Aarhus University, 8000 Aarhus, Denmark
  - <sup>9</sup> Laboratorio de Biología Acuática, Facultad de Biología, Universidad Michoacana de San Nicolás de Hidalgo, Morelia 58000, Mexico; arelyr@umich.mx (A.R.-G.)
  - <sup>10</sup> Department of Biology, Burdur Mehmet Akif Ersoy University, Burdur 15030, Türkiye; innald@gmail.com (D.İ.)
  - <sup>11</sup> Centre for Ecosystem Research and Implementation (EKOSAM), Middle East Technical University, 06800 Ankara, Türkiye
  - <sup>12</sup> Arctic Research Centre (ARC), Aarhus University, 8000 Aarhus, Denmark
  - <sup>13</sup> Sino-Danish Centre for Education and Research (SDC), Beijing 101408, China
  - <sup>14</sup> Institute for Ecological Research and Pollution Control of Plateau Lakes, School of Ecology and Environmental Sciences, Yunnan University, Kunming 650500, China
- \* Correspondence: korkmaz.hidro@gmail.com

## Supplementary Materials

**Figure S1.** Current and future distribution of *Anatolichthys anatoliae*, *Anatolichthys iconii*, *Capoeta pestai* and *Chondrostoma beysehirense* in the CAE. Colours show habitat suitability and the value of suitability increases in red areas.

**Figure S2.** Current and future distribution of *Oxyinoemacheilus nasreddini*, *Pseudophoxinus anatolicus*, *Pseudophoxinus crassus*, and *Squalius recurvirostris* in the CAE. Colours show habitat suitability and the value of suitability increases in red areas.

**Table S1.** Endemic fish fauna of the Central Anatolian Ecoregion and their IUCN conservation status.

**Table S2.** The environmental predictors used in the SDM with their variance inflation factors (VIF) after the exclusion of collinear variables

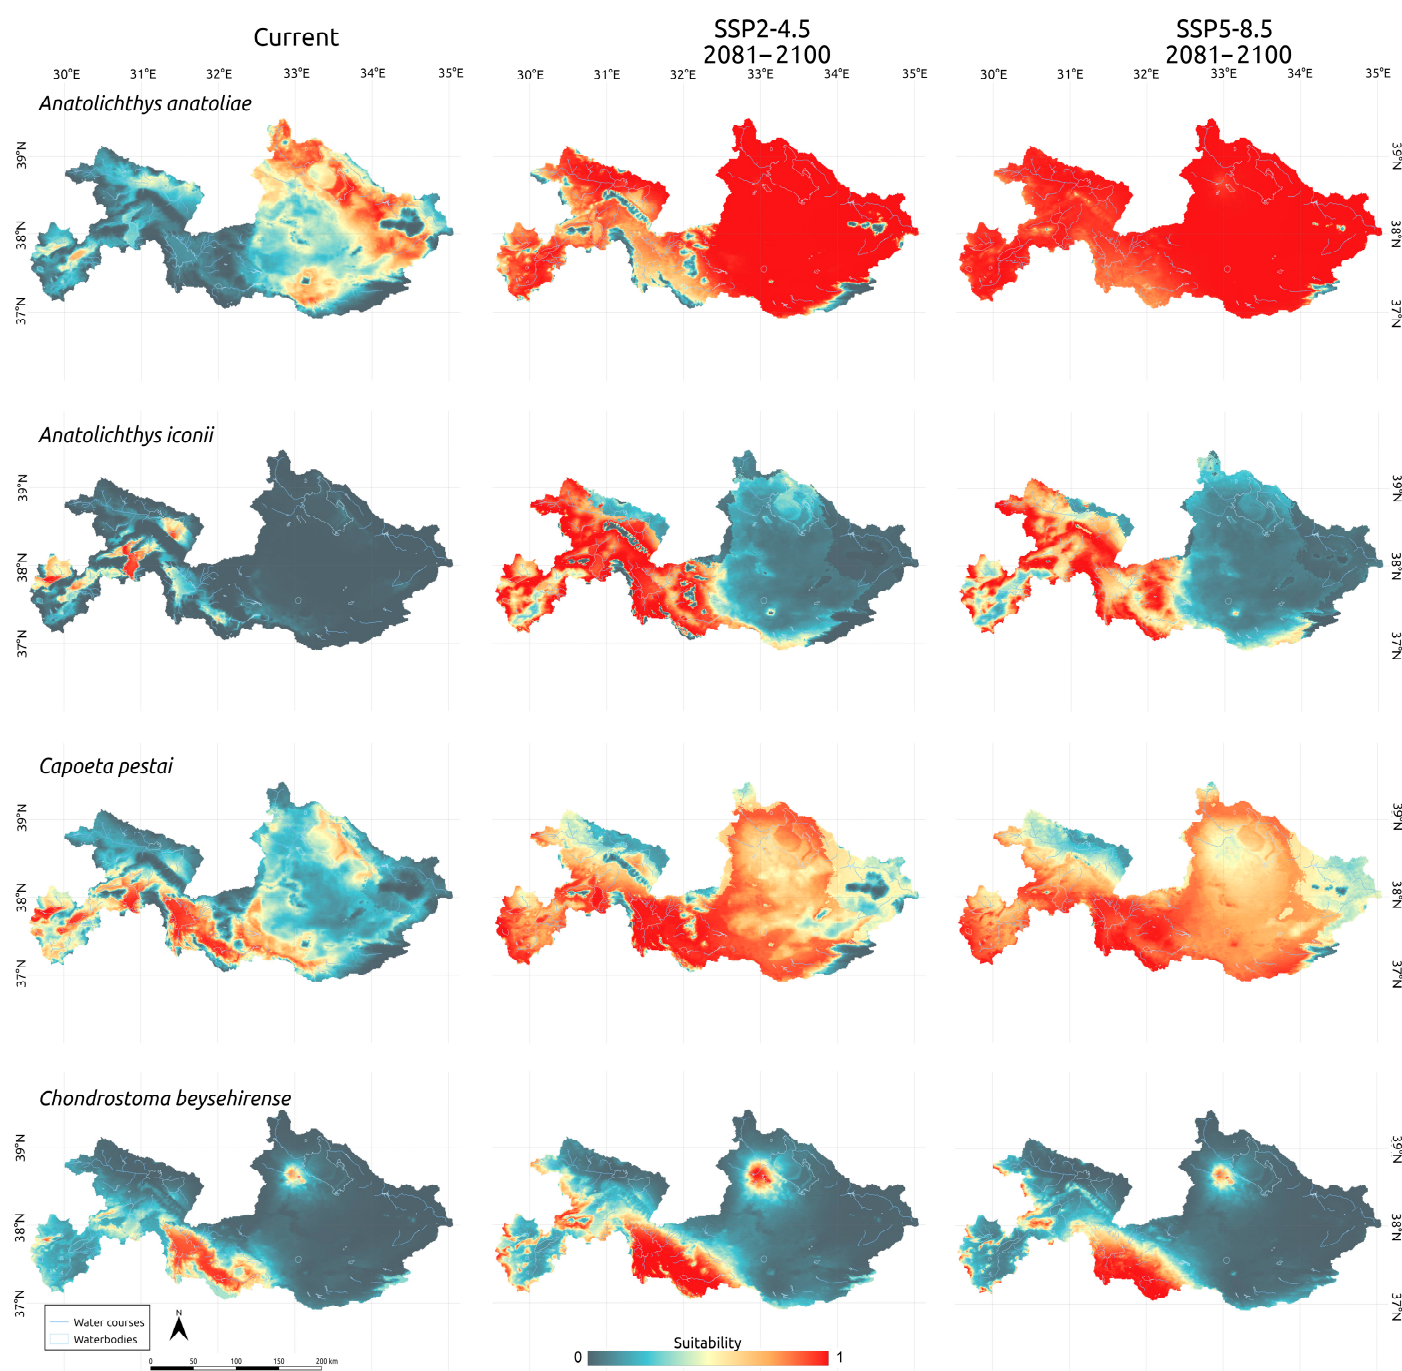

**Figure S1.** Current and future distribution of *Anatolichthys anatoliae*, *Anatolichthys iconii*, *Capoeta pestai* and *Chondrostoma beysehirense* in the CAE. Colours show habitat suitability and the value of suitability increases in red areas.

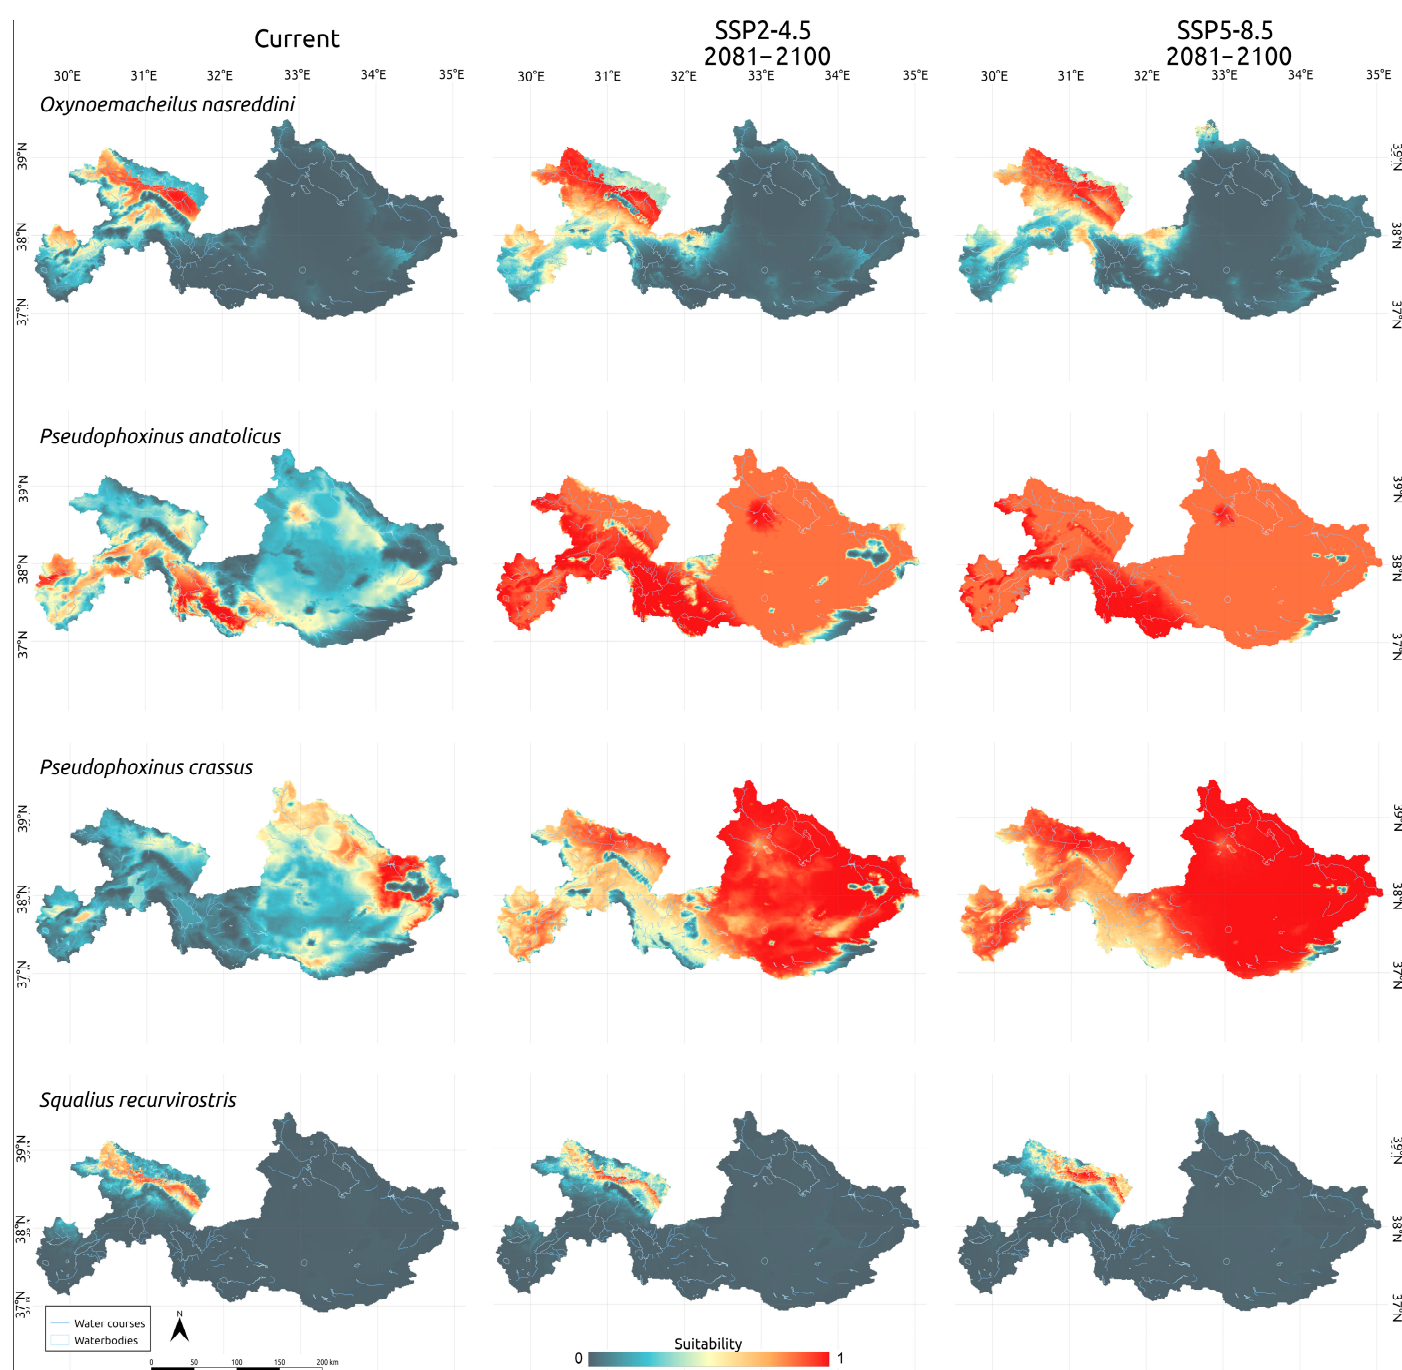

**Figure S2.** Current and future distribution of *Oxynoemacheilus nasreddini*, *Pseudophoxinus anatolicus*, *Pseudophoxinus crassus*, and *Squalius recurvirostris* in the CAE. Colours show habitat suitability and the value of suitability increases in red areas.

**Table S1.** Endemic fish fauna of the Central Anatolian Ecoregion [28,29,32,37,41,44,46–53,85–91,104–111], and their IUCN conservation status [80].

| Species                                                                         | Basin | Conservation Status |
|---------------------------------------------------------------------------------|-------|---------------------|
| <i>Alburnus akili</i> Battalgil 1942                                            | KCB   | EX                  |
| <i>Alburnus escherichii</i> Steindachner 1897                                   | ARB   | LC                  |
| <i>Anatolichthys anatoliae</i> (Leidenfrost 1912)                               | KCB   | NT                  |
| <i>Anatolichthys fontinalis</i> (Akşiray 1948)                                  | BB    | NE                  |
| <i>Anatolichthys iconii</i> (Akşiray 1948)                                      | KCB   | NE                  |
| <i>Anatolichthys meridionalis</i> (Akşiray 1948)                                | BB    | NE                  |
| <i>Anatolichthys saldae</i> (Akşiray 1955)                                      | BB    | NE                  |
| <i>Anatolichthys sureyanus</i> (Neu 1937)                                       | BB    | EN                  |
| <i>Anatolichthys transgrediens</i> (Ermin 1946)                                 | BB    | CR                  |
| <i>Capoeta pestai</i> (Pietschmann 1933)                                        | KCB   | EN                  |
| <i>Chondrostoma beysehirense</i> Bogutskaya 1997                                | KCB   | EN                  |
| <i>Cobitis battalgilae</i> Băcescu 1962                                         | KCB   | EN                  |
| <i>Cobitis bilseli</i> Battalgil 1942                                           | KCB   | EN                  |
| <i>Cobitis phrygica</i> Battalgil 1944                                          | BB    | EN                  |
| <i>Egirdira nigra</i> (Kosswig & Geldiay 1952)                                  | EB    | EN                  |
| <i>Garra kemali</i> (Hankó 1925)                                                | KCB   | EN                  |
| <i>Gobio gymnotethus</i> Ladiges 1960                                           | KCB   | CR                  |
| <i>Gobio hettitorum</i> Ladiges 1960                                            | KCB   | CR                  |
| <i>Gobio insuayanus</i> Ladiges 1960                                            | KCB   | CR                  |
| <i>Gobio intermedius</i> Battalgil 1944                                         | ARB   | EN                  |
| <i>Gobio microlepidotus</i> Battalgil 1942                                      | KCB   | VU                  |
| <i>Oxynoemacheilus anatolicus</i> Erk'akan, Özeren & Nalbant 2008               | BB    | EN                  |
| <i>Oxynoemacheilus eregliensis</i> (Bănărescu & Nalbant 1978)                   | KCB   | VU                  |
| <i>Oxynoemacheilus nasreddini</i> Yoğurtçuoğlu, Kaya & Freyhof 2021             | ARB   | NE                  |
| <i>Paraphanius similis</i> (Akşiray 1948)                                       | KCB   | NE                  |
| <i>Pseudophoxinus anatolicus</i> (Hankó 1925)                                   | KCB   | EN                  |
| <i>Pseudophoxinus battalgilae</i> Bogutskaya 1997                               | KCB   | LC                  |
| <i>Pseudophoxinus burduricus</i> Küçük, Gülle, Güçlü, Çiftçi & Erdoğan 2013     | BB    | EN                  |
| <i>Pseudophoxinus caralis</i> (Battalgil 1942)                                  | KCB   | NE                  |
| <i>Pseudophoxinus crassus</i> (Ladiges 1960)                                    | KCB   | EN                  |
| <i>Pseudophoxinus handlirschi</i> (Pietschmann 1933)                            | EB    | EX                  |
| <i>Pseudophoxinus hittitorum</i> Freyhof & Özuluğ 2010                          | KCB   | EN                  |
| <i>Pseudophoxinus iconii</i> Küçük, Gülle & Güçlü 2016                          | KCB   | NE                  |
| <i>Pseudophoxinus mehmeti</i> Ekmekçi, Atalay, Yoğurtçuoğlu, Turan & Küçük 2015 | BB    | NE                  |
| <i>Pseudophoxinus ninae</i> Freyhof & Özuluğ 2006                               | BB    | CR                  |
| <i>Seminemacheilus dursunavsari</i> Çiçek, 2020                                 | KCB   | NE                  |
| <i>Seminemacheilus ekmekciae</i> Yoğurtçuoğlu, Kaya, Geiger & Freyhof 2020      | KCB   | NE                  |
| <i>Seminemacheilus ispartensis</i> Erk'akan, Nalbant & Özeren 2007              | EB    | VU                  |
| <i>Seminemacheilus lendlii</i> (Hankó, 1925)                                    | KCB   | VU                  |
| <i>Squalius anatolicus</i> (Bogutskaya, 1997)                                   | KCB   | LC                  |
| <i>Squalius cappadocicus</i> Özuluğ & Freyhof 2011                              | KCB   | CR                  |
| <i>Squalius recurvirostris</i> Özuluğ & Freyhof 2011                            | ARB   | VU                  |
| <i>Turcichondrostoma fahirae</i> (Ladiges 1960)                                 | BB    | EN                  |

ARB: Akarçay River Basin; BB: Burdur Basin; EB: Eğirdir Basin; KCB: Konya Closed Basin; CR, critically endangered; EN, endangered; EX: Extinct; VU, vulnerable; NT, near threatened; LC, least concern; NE, not evaluated based on the IUCN Red List.

**Table S2.** The environmental predictors used in the SDM with their variance inflation factors (VIF) after the exclusion of collinear variables

| Variables | VIF  |
|-----------|------|
| Bio_1     | 1.40 |
| Bio_3     | 1.61 |
| Bio_4     | 1.51 |
| Bio_8     | 1.75 |
| Bio_12    | 2.06 |
| Bio_15    | 1.52 |
